# Supplementary material for: Glutathione S-transferase 4 is a putative DIF-binding protein that regulates the size of fruiting bodies in Dictyostelium discoideum
Source: PubMed Central journal article supplement — Biochem Biophys Rep. 2016 Sep 19;8:219–26. doi: 10.1016/j.bbrep.2016.09.006 (PMC5613964; doi:10.1016/j.bbrep.2016.09.006), 2016-09-19
Supplement: mmc5.pdf [file mmc5.pdf]

## Supplementary Materials

```
1 ATGTCTCATTTAACTCCAAAACCAAACGTTTTAAATGTATATGGAGCAGGAACACCAAACCTTTGTAAAAG 70
71 TTCAAATTTTATTAGAAGAAAAAACATTCTCATGTTTACCATAAAATTGATTTTTCAAAAATGAACA 140
141 ATTTGATCCAGAATTTTAAAGTTTTACCAAATAATAAAATCCAGCAATTGTCGATAATACAGTTGAA 210
211 CCAAATGGTATTAGTGATTTTAAAAGTGCAGCAATTTAATGTACTTATCTGAAAAACATCAATTCACCG 280
281 ATCTTTATGCAGATTTTAAAAC TGACCAGCATTACATGCCAAACATTTAGAATTTTATTCTTCCAAAT 350
351 GAGTGGTGTTGGCCCAATGACAGGTCAATTAGGTTGGTTCCTTCGTCAACCAGAACCAAAGAATACTCAA 420
421 GCAATTGAAAGATATTCTGAAGAAGTAAAAGATTATATAGAGTTTTAGATAAAATACTCTCAACTAATA 490
491 CTTGGGTAGCCGGTGAACAATATAGTATTGCTGATATCAGTCTTTTAGGTTGGGCTTTATATTTCTTAAA 560
561 AGGTTATTATGATGATCATATCACCAGAGAACAATCCCAAATGTTTATCGTTGGTTAGATTTAGCTGCT 630
631 AAAAGACCAGCAATCATTTAAAGTTTTAGAAACAATCAACCAAACAAAAATAA 684
```

**Fig. 1.** Open reading frame of *gst4* gene.

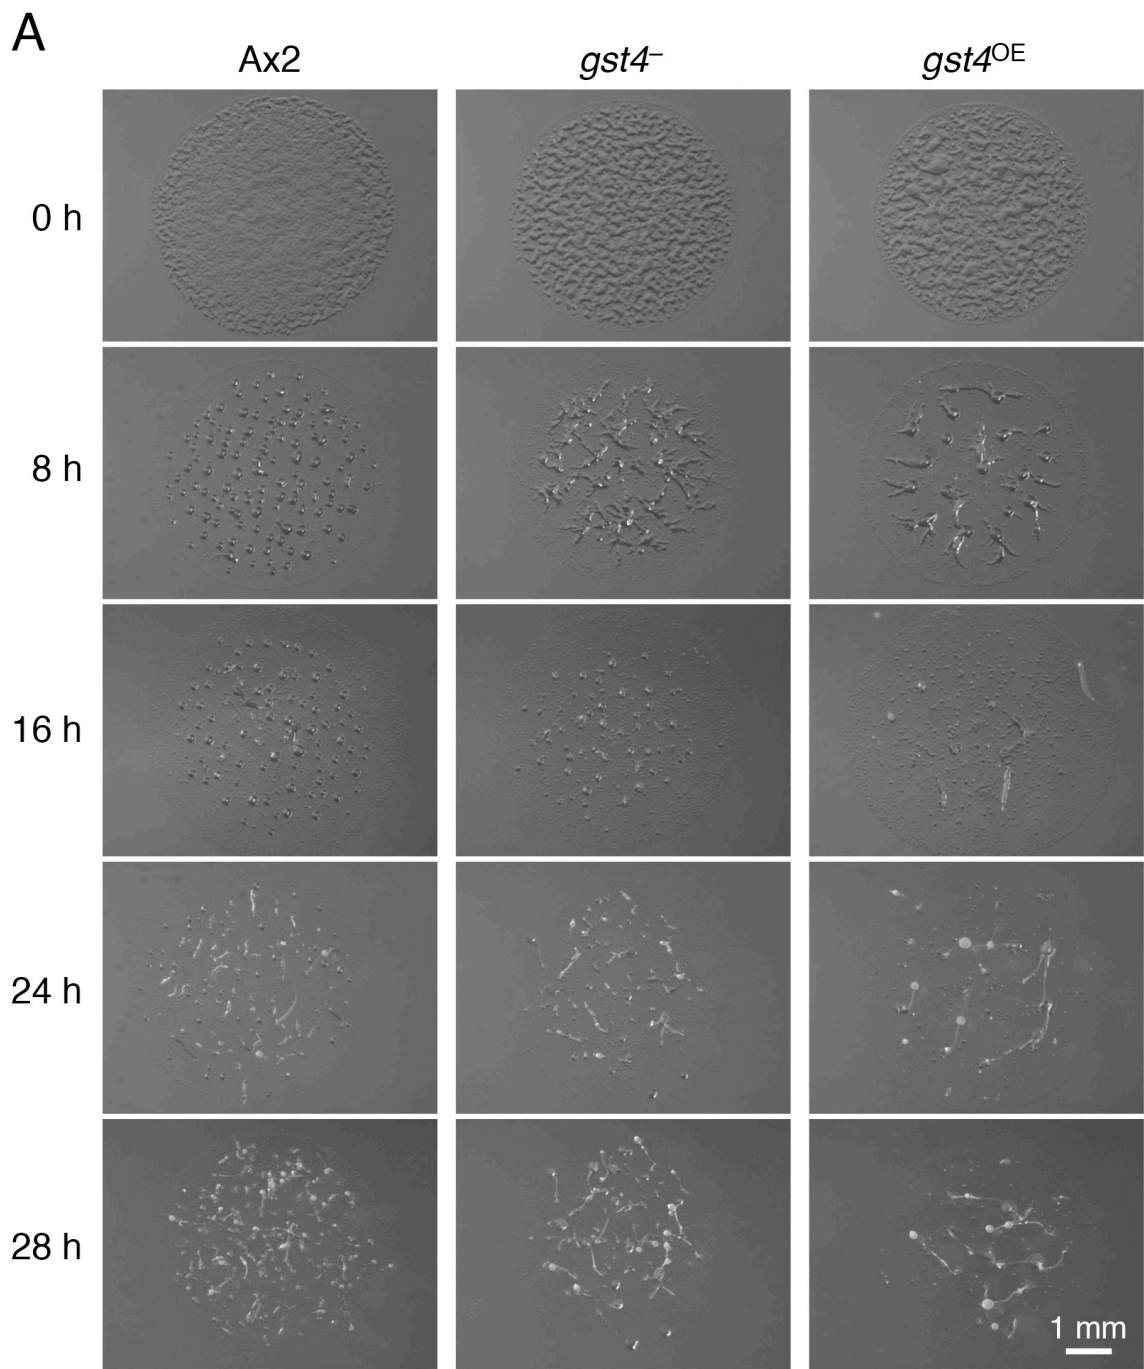

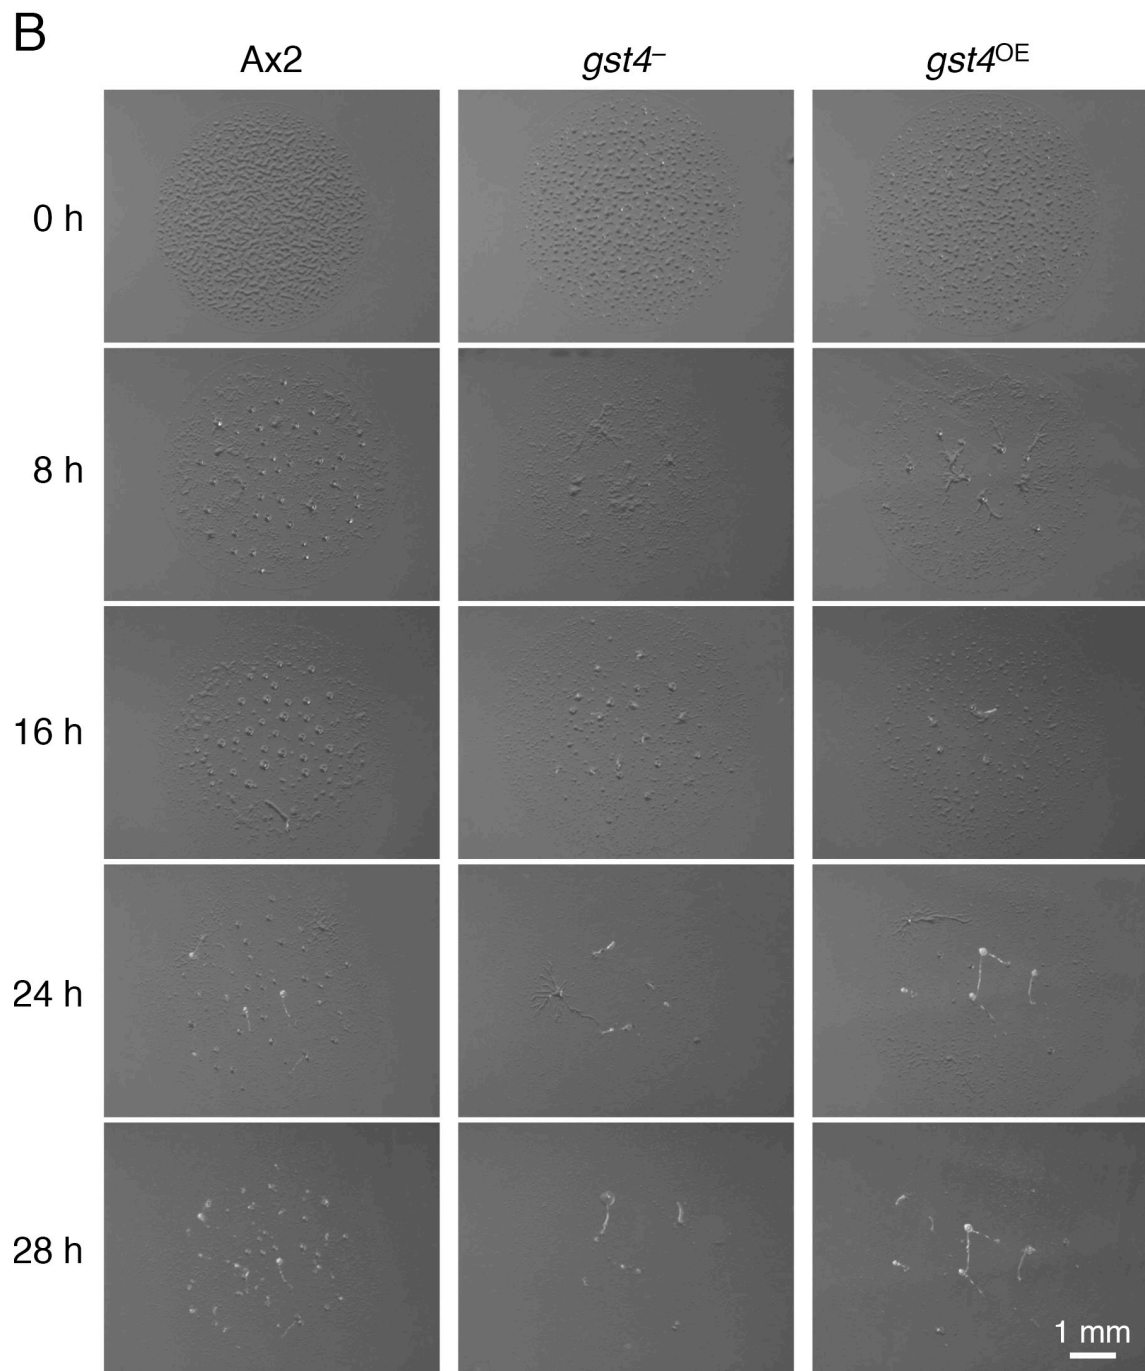

**Fig. 2.** Developmental phenotypes of *gst4* mutants at low cell densities ( $<5 \times 10^6$  cells/cm<sup>2</sup>). *Ax2*, *gst4<sup>-</sup>*, and *gst4<sup>OE</sup>* cells were grown in an axenic medium, and starved cells were plated on agar at  $1 \times 10^6$  cells/cm<sup>2</sup> (**A**) or  $2 \times 10^5$  cells/cm<sup>2</sup> (**B**) and allowed to form fruiting bodies. The cells were evaluated at the indicated time points, and representative photos are shown. Bar=1 mm.
